# Supplementary material for: Dietary Supplementation of Bacillus sp. PM8313 with β-glucan Modulates the Intestinal Microbiota of Red Sea Bream (Pagrus major) to Increase Growth, Immunity, and Disease Resistance
Source: PubMed Central journal article supplement (PMC9353131; doi:10.3389/fimmu.2022.960554), 2022-07-22
Supplement: Image_1.pdf [file Image_1.pdf]

## Supplementary Material

### 1.1 Supplementary Figures

A

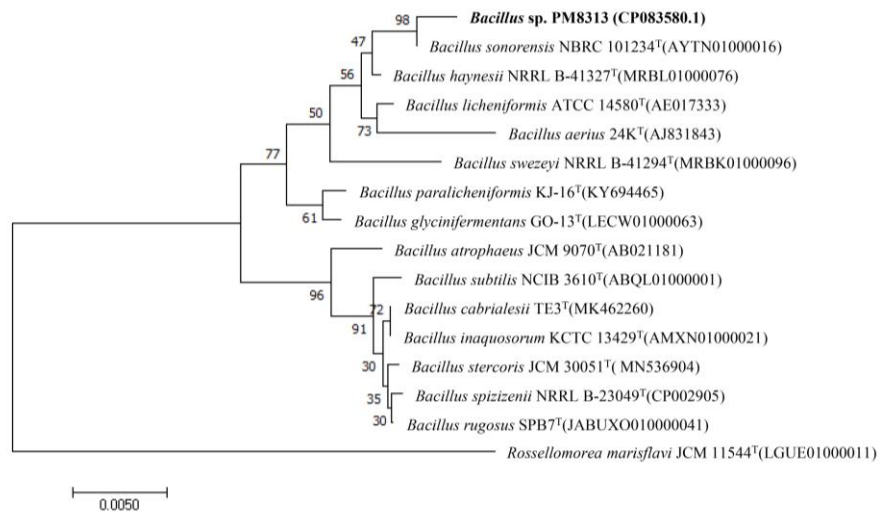

B

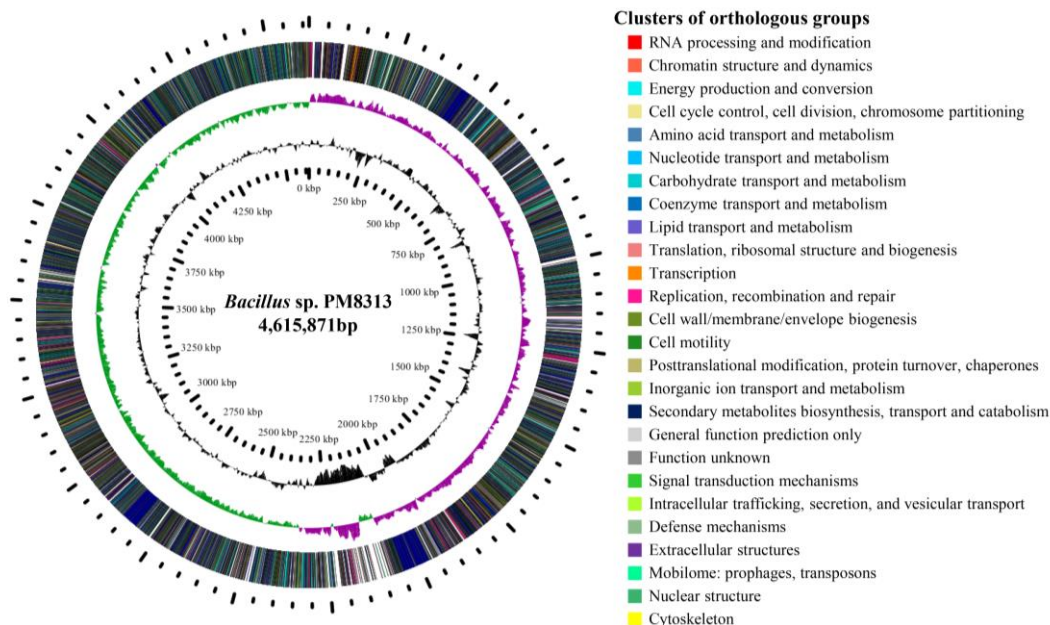

**Supplementary Figure 1.** Phylogenetic tree and genome circular map of *Bacillus sp. PM8313*. (A) The phylogenetic tree was constructed by the neighbor joining method using MEGA 7 with 1,000 bootstrap repetitions, after which the 16S rRNA sequences were aligned by the Clustal W program. (B) Genome circular map was constructed using GView server. From the center to the outside: the number of bases, GC content, GC skew, location of all annotated ORFs (colored by COG categories).
